# Supplementary material
Source: PubMed Central journal article supplement (PMC6459124)
Supplement: jamaoncol-5-506-s001.pdf [file jamaoncol-5-506-s001.pdf]

# Supplementary Online Content 1

## Protocol

### **Title: Multi-institutional prospective randomized trial for effectiveness assessment of laparoscopic surgery for clinical stage I gastric cancer**

#### **1. Title of Research**

Multi-institutional prospective randomized trial for effectiveness assessment of laparoscopic surgery for clinical stage I gastric cancer

#### **2. Institution/Hospital (Address)**

Seoul National University Bundang Hospital  
(166 Gumi-ro Bundang-gu, Seongnam-si, 463-707, South Korea)

Ajou University School of Medicine  
(164 World cup-ro Yeongtong-gu, Suwon, 16499, Korea)

Dong-A University College of Medicine  
(3-1 Dongdaeshin-Dong Seo-Gu, Busan 602-715, Korea)

Yeouido St. Mary's Hospital  
(#62 Yeouido-dong, Yeongdeungpo-gu, Seoul, 150-713, Korea)

Seoul National University College of Medicine  
(101 Daehak-ro Jongno-gu, Seoul, 03080, Korea)

Keimyung University School of Medicine  
(56 Dalseong-ro Jung-gu, Daegu, 41931, Korea)

Soonchunhyang University Bucheon Hospital  
(170 Jomaru-ro Wonmi-gu, Bucheon, 420-767, Korea)

Chonbuk National University Hospital  
(20 Geonji-ro, Jeonju, 561-712, Korea)

Seoul St. Mary's Hospital  
(222 Banpo-daero Seocho-gu, Seoul, 06591, Korea)

Chungnam National University Hospital  
(282 Munhwa-ro Jung-gu, Daejeon, 35015, Korea)

Chonnam National University Hwasun Hospital

34 (22 Seoyang-ro Hwasun-eup, Hwasun, 58128, Korea)  
35 Ewha Womans University Mokdong Hospital  
36 (1071 Anyancheon-ro Yangcheon-gu, Seoul, 158-710, Korea)  
37 Yonsei University College of Medicine  
38 (50-1 Yonsei-ro Seodaemun-gu, 120-752, Seoul, Korea)

39

### 40 **3. Investigators**

41 Hyung-Ho Kim : Department of Surgery, Seoul National University Bundang Hospital, Seongnam  
42 Sang-Uk Han : Department of Surgery, Ajou University School of Medicine, Suwon  
43 Min-Chan Kim : Department of Surgery, Dong-A University College of Medicine, Busan  
44 Wook Kim : Department of Surgery, Yeouido St. Mary's Hospital, The Catholic University of Korea  
45 College of Medicine, Seoul  
46 Hyuk-Joon Lee : Department of Surgery, Cancer Research Institute, Seoul National University College of  
47 Medicine, Seoul  
48 Seung Wan Ryu : Department of Surgery, Keimyung University School of Medicine, Daegu  
49 Gyu Seok Cho : Department of Surgery, Soonchunhyang University Bucheon Hospital, Soonchunhyang  
50 University College of Medicine, Bucheon  
51 Chan Young Kim : Department of Surgery, Chonbuk National University Hospital, Jeonju  
52 Han-Kwang Yang : Department of Surgery, Cancer Research Institute, Seoul National University College  
53 of Medicine, Seoul  
54 Do Joong Park : Department of Surgery, Seoul National University Bundang Hospital, Seongnam  
55 Kyo Young Song : Department of Surgery, Seoul St. Mary's Hospital, The Catholic University of Korea  
56 College of Medicine, Seoul  
57 Sang IL Lee : Department of Surgery, Chungnam National University Hospital, Daejeon  
58 Seong Yeob Ryu : Department of Surgery, Chonnam National University Medical School, Gwangju  
59 Joo Ho Lee : Department of Surgery, Ewha Womans University Mokdong Hospital, Seoul  
60 Woo Jin Hyung : Department of Surgery, Yonsei University College of Medicine, Seoul  
61 Korean Laparo-endoscopic Gastrointestinal Surgery Study (KLASS) Group

62

### 63 **4. Purpose and Background of Clinical Trials**

#### 64 **4.1 Purpose of Clinical Trials**

##### 65 1) Primary Endpoint

66 The purpose of this clinical trial is to verify that the 5-year overall survival rate of laparoscopic distal  
67 subtotal gastrectomy is non-inferior to open distal subtotal gastrectomy in the treatment of clinical stage I  
68 gastric cancer.

69

70

71 2) Secondary Endpoints

72 Disease-free survival and recurrence

73 Morbidity (Early postoperative morbidity defined as complications that occur within thirty days after  
74 surgery/ Late postoperative morbidity defined as complications that occur after postoperative day 30) and  
75 mortality

76 Quality of life

77 Inflammation and immune response

78 Cost-effectiveness

79

## 80 **4.2 Background of Clinical Trials**

81 1) Epidemiology of gastric cancer

82 Gastric cancer, the most prevalent type of cancer in Korea, accounts for 20.2% of all cases of cancer  
83 according to a 2002 report by the Korea Central Cancer Registry Program. In 2001, Statistics Korea  
84 associated gastric cancer with the second highest mortality rate, trailing behind lung cancer. It is known  
85 as the cause of death for 24 in every 100,000 Koreans.

86

87 2) Increase in early gastric cancer

88 The introduction of endoscopy has led to a significant increase in the diagnosis of early gastric cancer.  
89 According to a report by the Korean Gastric Cancer Association, the proportion of early gastric cancer  
90 rose from 28.6% in 1995 to 32.8% in 1999.<sup>1</sup> This trend was more prominent in the case of Japan, with a  
91 2000 study by Maehara et al. showing an increase in the proportion of early gastric cancer from 18% to  
92 57% in the past twenty years. Early gastric cancer refers to invasive gastric cancer that invades no more  
93 deeply than the submucosa, regardless of lymph node metastasis. Curative resection is possible in most  
94 cases, and if performed, at least 95% of patients achieve long-term survival without recurrence. The  
95 General Surgery Department of Seoul National University Hospital observed 1,452 patients who had  
96 received curative resection for early gastric cancer from 1986 to 1995, and reported a 5-year recurrence  
97 rate of 1.8%, which is equivalent to 26 patients.<sup>2</sup> Following the successful treatment of early gastric  
98 cancer, research on surgical procedures has begun to focus on the improved survival rate and the quality  
99 of life (QOL) of patients.<sup>3</sup>

100

101 3) Treatment of early gastric cancer

102 The prognosis of gastric cancer depends on the depth of invasion through the stomach wall and lymph  
103 node metastasis. Early gastric cancer refers to cancer in which invasion has occurred no more deeply than  
104 the submucosa. The possibility of lymph node metastasis, usually limited to level I lymph nodes, is 4%  
105 for tumors confined to the mucosa and 20% in the case of submucosal infiltration. Recommended surgical

106 procedures are subtotal gastrectomy for two-thirds of the stomach, total gastrectomy or dissection of level  
 107 II lymph nodes. In other words, about 80% of patients suffering from early gastric cancer undergo more  
 108 intensive surgeries that necessary.

109

110 4) Development of laparoscopic surgery

111 Laparoscopic gastrointestinal surgery was first introduced in 1991 with laparoscopic Nissen  
 112 fundoplication.<sup>4,5</sup> For gastric cancer, Ohgami et al. attempted laparoscopic wedge resection in 1992,<sup>6</sup> and  
 113 Kitano et al. employed laparoscopy-assisted gastrectomy including lymphadenectomy in 1994.<sup>7</sup> In the  
 114 mid-1990s, laparoscopic gastrointestinal surgery grew more widespread due to improved surgical  
 115 procedures, development of surgical tools, and a greater interest in patients' QOL among surgeons.  
 116 Recently, Korea has also seen a surge in laparoscopic gastrointestinal surgery. According to a report by  
 117 the Information Committee of the Korean Gastric Cancer Association and the Korean Laparoendoscopic  
 118 Gastrointestinal Surgery Study Group, the total cases of laparoscopic gastrointestinal surgery in Korea  
 119 were 70 in 2000, 209 in 2001, 328 in 2002, 539 in 2003, and 1,005 in 2004 (Fig. 1).<sup>8</sup> This steady increase  
 120 can be attributed to the employment of laparoscopic surgery in the treatment of malignant diseases.  
 121 Among the aforementioned cases, malignant diseases accounted for 87 in 2001, 181 in 2002, 405 in 2003,  
 122 and 701 in 2004 (Fig. 2).

123

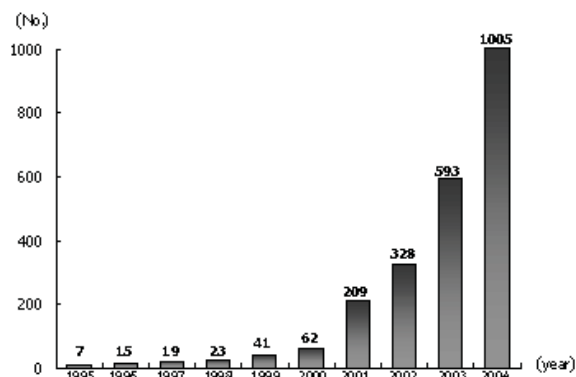

124

Figure 1. The number of total cases of laparoscopic gastrointestinal surgery in Korea

125

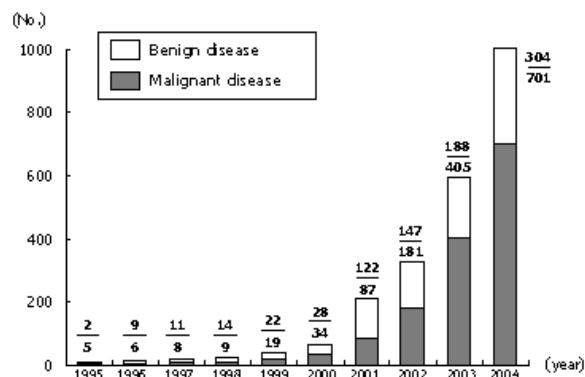

126 Figure 2. Laparoscopic gastrointestinal surgery in Korea according to benign and malignant disease

127 5) Problems

128 Given the lack of scientific evidence on the superiority of laparoscopic surgery, the increase in  
129 laparoscopic gastrointestinal surgery may be the result of surgeons' efforts to keep up with the changing  
130 times. Given the high cure rate of at least 90% using current methods, extra caution must be exercised  
131 when presenting a new surgical procedure for early gastric cancer. More objective and scientific evidence  
132 is required on the standardization of laparoscopic surgical procedures, the stability of laparoscopic  
133 surgery, recurrence and survival rates, QOL after laparoscopic surgery, and surgical costs.

134

135 6) Significance of research in Korea

136 Active research is being conducted on the advantages offered by laparoscopic surgery in the treatment  
137 of gastric cancer, but most studies are retrospective, and the handful of prospective studies have only been  
138 performed on small groups. Large-scale, multi-institutional, prospective, randomized research on the  
139 short-term benefits and long-term survival of laparoscopic surgery for gastric cancer has not been  
140 attempted.<sup>9-12</sup> If Korea pursues multi-institutional, large-scale, prospective, randomized research in this  
141 field, it will be the first of its kind in the world. Since Korea and Japan have seen greater success in the  
142 treatment of gastric cancer than the West, the prospective, randomized research by surgeons with  
143 extensive experience in laparoscopic surgery for gastric cancer is expected to produce highly significant  
144 results.

145

146 7) Feasibility and validity

147 The doctors participating in this study specialize in gastric surgery, and the general surgeons have  
148 performed open gastrectomy and laparoscopic gastrectomy at least 50 times each. The affiliated hospitals  
149 treat more than 80 cases of gastric cancer in a year. In addition to the retrospective analysis, the results of  
150 laparoscopic gastrectomy performed by the participating surgeons were analyzed as a preliminary study.  
151 Out of the 723 patients, 612 (84.6%) suffered from early gastric cancer and 111 (15.4%) from advanced  
152 gastric cancer. By gender, there were 437 males and 286 females. The patients had an average age of 56.4  
153 (24-87) and an average body mass index of 23.3 (13.9-36.2) kg/m<sup>2</sup>. Total gastrectomy was performed for  
154 72 (10.0%) patients, distal subtotal gastrectomy for 638 (88.2%), and proximal gastrectomy for 13 (1.8%).  
155 After the gastrectomy, B-I was performed for 464 (64.2%) patients, B-II for 143 (19.8%), Roux-en Y for  
156 103 (14.2%), and esophagogastrostomy for 13 (1.8%). The average time spent on surgery was 226.8 (90-  
157 520) minutes, and the number of dissected lymph nodes averaged to 30.7 (6-84). Under the UICC stage  
158 classification, there were 558 (77.2%) patients in stage Ia, 102 (14.1%) in Ib, 46 (6.4%) in II, 14 (1.9%) in  
159 IIIa, 2 (0.3%) in IIIb, and 1 (0.1%) in IV. The incidence of post-surgery complications and mortality were  
160 13.0% (94 cases) and 0.6% (4 cases), respectively. Wound infection was the most common at 4%,  
161 followed by intra-abdominal bleeding at 2.2%, intra-abdominal abscess at 1.6%, gastrointestinal bleeding

162 at 1.2%, anastomotic leakage at 1.1%, intestinal obstruction at 0.8%, and anastomotic stricture at 0.6%.  
163 The time taken to pass gas after surgery was 3.3 days on average, and the average length of stay for  
164 patients without post-surgery complications was 8.0 days. A follow-up study was performed on 708  
165 (98%) out of 719 patients, with the exception of the four deaths caused by surgery. Three patients had  
166 died from diseases other than gastric cancer, and one from the recurrence of gastric cancer. A total of  
167 eight patients developed recurrence, with three in the peritoneum, and one each in the lymph nodes, bones,  
168 ovary, remnant stomach and port site. One of the patients with recurrence in the peritoneum, and those  
169 with recurrence in the bones and ovary had been diagnosed with advanced gastric cancer. The remaining  
170 were early gastric cancer patients. The results indicate that the procedure is likely to be effective in the  
171 treatment of early gastric cancer if carefully performed by general surgeons with extensive experience in  
172 laparoscopic gastrectomy. This will be presented in the upcoming June congress of the European  
173 Association for Endoscopic Surgery. The implementation of this multi-institutional, prospective research  
174 to develop and standardize laparoscopic surgical procedures for gastric cancer based on comparisons with  
175 open gastrectomy in terms of standardization process, stability of surgical procedures, post-surgery  
176 recurrence, survival rates, QOL after surgery, and surgical costs will not only contribute to the  
177 standardization of gastric cancer treatment and QOL of gastric cancer patients, but also lower the medical  
178 costs involved. The research will lead to qualitative improvements in the treatment of gastric cancer  
179 patients and provide measures to effectively lower the related medical costs.

180

## 181 **5. Target diseases and subjects**

### 182 **5.1 Selection criteria**

- 183 1) A patient aged between 20 to 80 years old
- 184 2) Pathologically proven gastric adenocarcinoma based on endoscopic evaluation
- 185 3) ASA (American society of anesthesiology) score I – III
- 186 4) ECOG PS (Eastern cooperative oncology group performance status) 0 or 1
- 187 5) Preoperative stage of cT1N0M0, cT1N1M0, and cT2aN0M0 according to American Joint Committee  
188 on Cancer/Union for International Cancer Control 6<sup>th</sup> edition
- 189 6) A patient deemed fit for subtotal gastrectomy
- 190 7) A patient who has provided consent for participation (or a patient whose guardian has provided  
191 consent) after receiving general instructions

192

### 193 **5.2 Exclusion criteria**

- 194 1) A patient with a history of gastrectomy
- 195 2) A patient who has received radiotherapy, immunotherapy or chemotherapy for cancer in another organ  
196 before being diagnosed with gastric cancer
- 197 3) A patient with active synchronous double cancer (suffering from cancer in another organ)

- 198 4) A patient who has received treatment for systemic inflammatory disease before surgery  
 199 5) A patient who has participated in other clinical tests in the past six months, or is still participating in  
 200 such tests  
 201 6) A patient considered vulnerable (One who is incapable of adequate communication, one who is  
 202 pregnant or plans to be pregnant)  
 203

## 204 7. Number of research subjects and basis of calculation

### 205 7.1 Number of research subjects

206 The number of required cases is 1400 (700 cases of laparoscopic gastrectomy and 700 cases of open  
 207 gastrectomy).  
 208

### 209 7.2 Basis of calculation

210 This study calculates the effective number of subjects based on the 5-year overall survival rate after open  
 211 gastrectomy. The assumptions are listed below.

- 212 1) Significance level  $\alpha=0.05$   
 213 2) Type II error ( $\beta$ ) is set as 0.20 to maintain a power of 80%.  
 214 3) The number of open gastrectomy cases is the same as the number of laparoscopic gastrectomy cases.  
 215 [n1 (number of open gastrectomy cases) = n2 (number of laparoscopic gastrectomy cases)]  
 216 4) Based on previous literatures, the 5-year overall survival rate (p1) of open gastrectomy is presumed to  
 217 be 90%. The same is assumed for laparoscopic gastrectomy (p2). In this study, we set the non-inferiority  
 218 margin at 5% (non-inferiority test).  
 219 5)  $H0: p1-p2 \leq \delta$  vs  $H1: p1-p2 > \delta$   
 220 6) The survival functions of both groups follow an exponential, and proportional hazards is assumed.

221 \*\* Calculation process

- 222 - Non-inferiority margin of 5%  
 223 The survival function of open gastrectomy and laparoscopic gastrectomy is  $S1(t)=\exp(-\lambda_1t)$  and  
 224  $S2(t)=\exp(-\lambda_2t)$  respectively. Since the ratio of hazards between the two groups is  
 225  $\Delta_0=\ln(0.85)/\ln(0.9)=1.5403$ . The null hypothesis and alternative hypothesis are as follows.  
 226 -  $H0: \Delta \geq \Delta_0$  vs.  $H1: \Delta < \Delta_0$   
 227 - Assuming  $n1=n2$ , the proportion of patients in each group represented by p1 and p2 is 0.5, the  
 228 patient registration period a is 2.5 years, the follow-up observation period b is 5 years, and the  
 229 common hazards rate of the two groups under the alternative hypothesis is  $\lambda = -1/5\ln(0.85)=0.0325$ .  
 230 - Formula

$$D = \frac{[\sqrt{\Delta_0} z_{1-\alpha} + (p_1 + p_2 \Delta_0) z_{1-\beta}]^2}{p_1 p_2 (\Delta_0 - 1)^2}$$

$$d = 1 - \frac{\exp(-\delta\lambda)}{a\lambda} [1 - \exp(-a\lambda)]$$

231

232 The number of patients required in each group is  $n=D/d$ .

| Target number (Unit: persons)                      | Laparoscopic | Open | Total |
|----------------------------------------------------|--------------|------|-------|
| Final number of subjects                           | 633          | 633  | 1266  |
| Number of subjects including withdrawal rate (10%) | 700          | 700  | 1400  |

233

## 234 8. Clinical trial methods

### 235 8.1 Conditions for participating surgeons and standardization of surgery

236 The surgeons participating in the trial were to have conducted at least 50 cases each of LADG and  
 237 ODG, and each participant's institution was to conduct at least 80 cases each year for surgical quality  
 238 control. We established a standardized protocol of the procedure, and all of the surgeons' operation  
 239 quality was assessed by 2 experienced surgeons' site visits. Then, all of the participating surgeons  
 240 thoroughly reviewed each other participant's unedited videos for the standardization and quality control  
 241 of the study.

242 To apply standardized procedures to all aspects of the surgery, video-based reviews and discussions  
 243 will continue to be held after the start of clinical trials. Video recordings will be made for all laparoscopic  
 244 surgery, and field photos will be taken after gastrectomy in the case of open surgery.

245

### 246 8.2 Institutional participation and patient registration

247 1) Patient registration will begin after obtaining approval from the institutional review board of affiliated  
 248 institutions.

249 2) Method of patient registration

250 General instructions on clinical trials are provided to obtain informed consent from patients who satisfy  
 251 all selection criteria and none of the exclusion criteria. A researcher of Seoul National University  
 252 Bundang Hospital, the principal institution, reviews the eligibility of selected subjects before registration  
 253 and randomization.

254 3) Considerations for registration

255 ① Patients are rejected if they refuse to participate after registration or do not undergo surgery within  
 256 30 days of registration.

257 ② For patients to participate in clinical trials after the 30-day limit, they must be reassessed according  
 258 to the initial registration criteria and provide consent again.

259 4) Completion period



260 Registration will end when the number of randomized, registered subjects reaches 1,400.

#### 261 5) Randomization method

262 A randomized table prepared by an independent data management group was used, and 60 codes are  
263 assigned by institution and researcher. Randomization is performed such that each researcher is assigned  
264 to one subject, and block randomization is carried out. The size of blocks remains undisclosed to  
265 researchers.

266 Two copies of the randomization table are made, and each stored by the researcher and the data  
267 management group. Research subjects are randomly assigned to the control group or test group, and the  
268 monitors of each institution are kept informed.

269

### 270 **8.4 Treatment details and collection of results**

271 Histopathological details determined based on pre-surgery records, surgical findings and results are  
272 recorded in the given form. The form is stored by researchers, and one copy is delivered to the  
273 institutional monitor during the regular meeting.

274

### 275 **8.5 Effectiveness assessment**

276 Follow-up surveys are performed over the long term, and the details to be recorded include surgery time,  
277 amount of blood loss, amount of blood transfusion, length of stay, early complications, late complications,  
278 recurrence and death. These surveys are standardized beforehand, and performed by all institutions in the  
279 same method and interval.

280

#### 281 1) Factors affecting QOL

282 The factors affecting QOL after surgery were the scope of gastrectomy, cancer stage and anticancer drug  
283 administration. The factors affecting recovery after surgery were the insertion of nanogastric tubes,  
284 surgery time and dissection of lymph nodes. Gastrectomy for both groups was in the form of subtotal  
285 gastrectomy. Most patients had been diagnosed with gastric cancer, and only a few with advanced gastric  
286 cancer. These factors were considered as having little influence on QOL. The same anticancer drugs will  
287 be administered to patients in stage 2 or worse to minimize error. The insertion of nanogastric tubes has  
288 been associated with severe throat pain and slow restoration of gastrointestinal function. Nanogastric  
289 tubes were not inserted based on reports of successful gas removal during surgery without such insertion.

290

#### 291 2) Post-surgery pain

292 - PCA (Patient-Controlled Analgesia) administration: To reduce pain adjustment differences arising from  
293 the type of PCA administration, intravenous administration was adopted for the research. Subjects were  
294 trained to self-administer analgesics whenever they experienced any post-surgery pain, and the amount  
295 administered was recorded 24 and 48 hours after surgery. - Administration of non-opioid analgesics: If

296 PCA is insufficient, non-opioid analgesics are administered via intramuscular injection, and the amount  
297 administered is recorded daily.

298 - VAS (Visual Analog Scale) : VAS is widely used in research and clinical trials as it is an effective, non-  
299 invasive pain assessment scale. Under VAS, patients rate their pain intensity on a scale of 1 to 10. Pain  
300 was recorded at rest (VAS-R) and during motion (VAS-M) for one day, two days, three days, five days  
301 and seven days following surgery.

302

303 3) Restoration of gastrointestinal function: The first passing of gas after surgery and soft food  
304 consumption are recorded.

305

306 4) Post-surgery length of stay: The length of stay after surgery is recorded.

307

308 5) Early postoperative morbidity :

309 ① defined as complications that occur within thirty days after surgery.

310 ② classified as follows:

311 A) wound morbidity: operation wound with seroma, hematoma, infection, dehiscence, or evisceration, etc.

312 B) surgical site morbidity: anastomosis bleeding or leakage, duodenal stump leakage, postoperative  
313 bleeding, afferent loop or efferent loop obstruction, etc.

314 C) lung morbidity: atelectasis, pleural effusion, empyema, pneumothorax, etc.

315 D) intestinal obstruction morbidity: no return of bowel movement until 5 days after surgery, mechanical  
316 obstruction with an air-fluid level or paralytic ileus on simple X-ray, etc.

317 E) urinary tract morbidity: frequency, nocturia, dysuria, increased white blood cell count on  
318 urine analysis, etc.

319 F) intra-abdominal abscess: the presence of septic fluid in the abdominal cavity that causes fever higher  
320 than 38°C and is proven by abdominal sonography or computed tomography (CT) scanning

321 G) postoperative pancreatitis: elevated serum amylase (> 150 U/L) with symptoms that are suggestive of  
322 pancreatitis such as back pain and fever

323 H) pancreatic fistula: drain amylase content greater than 1,000 U/L after postoperative day 3

324 I) intestinal fistula: presence of a bowel to bowel or bowel to cutaneous fistula tract that is confirmed by a  
325 fistulogram; 10) others: lymphorrhoea, diarrhoea, etc.

326

327 6) Late postoperative morbidity :

328 ① defined as complications that occur after postoperative day 30.

329 ② classified as follows:

330 A) adhesive ileus: mechanical or paralytic obstruction on CT scan accompanied by symptoms such as  
331 abdominal pain, vomiting, and no gas passing

332 B) anastomosis stricture: narrowing of the anastomosis that is confirmed by upper gastrointestinal series

333 C) reflux esophagitis: esophageal erosion to the stricture that is confirmed by endoscopy

334 D) malnutrition: iron deficiency anemia, megaloblastic anemia, or steatorrhea

335 E) dumping syndrome.

336

337 7) EORTC QLQ-C30

338 While various methods exist for the assessment of patients' QOL by doctors, emotional changes or social  
339 adaptation is difficult to measure, and doctors may prioritize factors considered unimportant by patients.

340 The QLQ-C30 questionnaire developed by EORTC is an example of a patient-centered questionnaire. It  
341 includes five functional scales (physical, role, emotional, cognitive, and social functioning) and symptom  
342 scales (fatigue, nausea and vomiting, pain, dyspnea, sleep disturbance, loss of appetite, constipation,  
343 diarrhea), and scales for general health and QOL. Patient responses are converted to a score from 0 to 100.  
344 In principle, the questionnaire is administered one year after surgery.

345

346 8) STO22

347 The STO22 has five multi-item scales (dysphasia, eating restriction, pain, reflux, and anxiety) and four  
348 single items (dry mouth, body image, taste and hair loss). Patient responses are converted to a score from  
349 0 to 100. First, multi-trait scaling analysis must be performed to check the Korean translation of STO22  
350 against the original version. If the correlation between items and scales is greater than 0.4, scale  
351 classification can be considered appropriate.

352 Second, the reliability and validity of the Korean STO22 must be assessed. To assess the reliability of  
353 the Korean STO22, Cronbach's alpha is obtained using the internal consistency method. A Cronbach's  
354 alpha of 0.7 or higher is considered acceptable. To assess the validity of the Korean STO22, ANOVA test  
355 was performed on ECOG PS and STO22 items. Given the similarity of STO22 items and QLQ-C30, the  
356 correlation between similar items is also examined.

357 After verifying the reliability and validity of the Korean STO22, average values for laparoscopic  
358 gastrectomy and open gastrectomy can be compared and analyzed.

359

360 9) Recurrence

361 Regardless of survival and mortality, all details concerning recurrence must be accurately recorded. These  
362 include the date of recurrence, location, type and method of verification.

363 The recurrence pattern is classified into eight categories: remnant gastric, locoregional, peritoneal, hepatic  
364 and extrahepatic hematogenous, lymphatic, mixed, and other recurrences. ① Remnant gastric recurrence  
365 includes tumors in the anastomosis or gastric stump.

366 ② Locoregional recurrence includes tumors in adjacent organs, including the gastric bed, porta hepatis,  
367 abdominal wall and the regional lymph nodes (perigastric, left gastric, common hepatic, celiac, and  
368 hepatoduodenal).

369 ③ Peritoneal recurrence is defined as peritoneal seeding or Krukenberg's tumor.

370 ④ Hematogenous metastasis is divided into hepatic and extrahepatic hematogenous recurrence. The  
371 latter includes recurrence in the lung, bone, brain, or other distant sites.

372 ⑤ Lymphatic recurrence is defined as tumors in the paraaortic, inguinal, Virchow's or other distant  
373 lymph nodes, or lung lymphangitic metastasis.

374 ⑥ The mixed pattern of recurrence includes those recurrences where the criteria for two or more of the  
375 above categories are met simultaneously

376

377 10) Death

378 Details such as date of death, cause of death and method of verification must be recorded. Intermediate  
379 assessment is performed based on the collected data.

380 For cases that cannot be tracked in follow-up surveys, researchers will attempt to contact the subjects by  
381 phone or mail.

382

383 11) Inflammatory and immune responses

384 CRP and IL-6 were used as markers of inflammatory response for patients in both groups. To compare  
385 immunity, measurements were taken for total lymphocyte, T-subset, B cell, NK cell count, IL-2, and  
386 TNF- $\alpha$ . These values were obtained before surgery, two hours after surgery, 24 hours after surgery, five  
387 days after surgery and 30 days after surgery. CRP and IL-6 are known to increase two hours after surgery.  
388 Blood samples were centrifuged at 3,000 rpm for five minutes and stored at  $-75^{\circ}\text{C}\sim-80^{\circ}\text{C}$ . After  
389 transferring samples from 1,000 patients to the laboratory, CRP and IL-5 were measured using latex-  
390 enhanced immunoturbidimetric assay and enzyme-linked immunosorbent assays (ELISA) respectively.

391 CRP and IL-5 levels were first recorded for the 1,000 patients immediately after registration for the  
392 study. The influence of inflammatory response on survival rates was analyzed following the analysis of  
393 5-year survival.

394

395 12) Cost-effectiveness

396 At discharge, the total cost will be calculated and the two groups will be compared with regard to cost-  
397 effectiveness. We evaluated not only social cost which may be calculated by time needed to resume  
398 normal social activity but also "willingness to pay" reflecting individual patient preference for a particular  
399 procedure. Information regarding factors affect cost (length of hospital stay, complications, presence of  
400 comorbidity, etc.) will be collected.

401

402 **9. Subject groups and statistical analysis**

403 **9.1 Subject groups**

404 1) Intention to treat (ITT) group

405 The analysis is performed on all patients who have participated in clinical trials, with the exception of  
406 those meeting the exclusion criteria below.

407 A. A patient who withdrew consent after randomization or after surgery

408 B. A patient who has not undergone surgery after randomization (Patients assigned to open  
409 gastrectomy but chose to undergo laparoscopic surgery and vice versa are included in the analysis).

410 C. A patient who received surgery but not gastrectomy

411 D. A patient who underwent surgery other than open gastrectomy and laparoscopic gastrectomy (e.g.  
412 robot surgery)

413 E. A patient who underwent gastrectomy other than subtotal gastrectomy (e.g. proximal gastrectomy)  
414 (However, patients who received total gastrectomy due to unexpectedly large tumors are included in  
415 the analysis).

416 F. A patient with malignant tumors in another organ

417 2) Per-protocol (PP) group

418 The PP group excludes the following patients among ITT.

419 A. A patient who chose to receive surgery of the other group other than the randomly assigned surgery  
420 (including conversion of laparoscopic gastrectomy to open gastrectomy)

421 B. A patient who received combined resection or total gastrectomy instead of subtotal gastrectomy

422 C. A patient who died due to surgical complications

423 D. A patient who received combined resection of other organs

424

425 **9.2 Statistical analysis methods**

426 1) Analysis of variables for primary clinical trials

427 With regard to the five-year survival of laparoscopy-assisted subtotal gastrectomy and open subtotal  
428 gastrectomy, the non-inferiority of overall survival rate of laparoscopic gastrectomy is assessed (non-  
429 inferiority limit of 5% for 5-year overall survival)

430 2) Analysis of variables for secondary clinical trials

431 A. With regard to the five-year disease-free survival of laparoscopy-assisted subtotal gastrectomy and  
432 open subtotal gastrectomy, Kaplan-Meier curve analysis and log rank test are performed.

433 B. The frequency of surgery-related complications is analyzed using a chi-square test.

434 All deaths within 90 days of surgery are investigated, and chi-square test is performed to analyze the  
435 relationship between deaths and complications.

436 C. Quality of life

- 437 a. For EORTC-C30, analysis is divided into the five functional scales (physical, role, emotional,  
438 cognitive, and social functioning), three symptom scales (fatigue, pain and nausea, and vomiting),  
439 one global health status and six single items.
- 440 b. For EORTC-STO22, analysis is divided into the five multi-item scales (dysphasia, eating restriction,  
441 pain, reflux, and anxiety) and four single items (dry mouth, body image, taste and hair loss).
- 442 c. The multilevel mixed effects linear regression model is used to analyze the difference in QOL  
443 between groups.
- 444 D. Inflammatory and immune responses (total lymphocyte, T-subset, B cell, NK cell count, IL-2, TNF-  
445  $\alpha$ );
- 446 a. The difference in inflammatory response over time between the two groups is examined using the  
447 repeated measure design of general linear models.
- 448 b. The Cox proportional hazard model is used to analyze the difference in survival rate in relation to  
449 inflammatory response.

450

### 451 **9.3 Analysis period and final analysis**

#### 452 1) Analysis period

453 Except in cases approved by the steering committee, the two groups will not be compared in terms of  
454 five-year overall survival, disease-free survival, and extent of recovery.

455

#### 456 2) Intermediate analysis

457 Intermediate analysis is performed at one-year intervals even while clinical trials are being carried out.  
458 The results of analysis are provided to all researchers, and the possibility of early conclusion is  
459 determined. The trials are immediately halted if surgery-related deaths exceed 5%.

460

#### 461 3) Final analysis

462 ① Final analysis is performed for all data upon completion of the five-year follow-up of all registered  
463 patients. A final report and summary are prepared based on the analysis.

464 ② The final report and summary are submitted to research participants and the steering committee of the  
465 Korean Laparoscopic Gastrointestinal Surgery Study Group (KLASS).

466 ③ The steering committee concludes clinical trials after writing a comprehensive report based on the  
467 final report.

468 ④ Once clinical trials are complete, all data will be under the ownership of the supervisor. Further  
469 materials may be provided in consultation with the steering committee if requested by research  
470 committees.

471

### 472 **10. Safety measures for research subjects**

473 - Expected side effects and risks for research subjects  
474 Complications (heat and lung complications, bleeding, infection, anastomotic issues) related to all open  
475 gastrectomy and laparoscopic gastrectomy are the same as previously reported.  
476 - Nondisclosure of identity  
477 Patients' medical records will be kept confidential, and anonymity will be maintained even when results  
478 are presented.  
479 - Abnormal reaction: All side effects occurring during the research will be recorded to derive the  
480 proportion of abnormal reactions. The incidence of abnormal reactions and confidence interval will be  
481 obtained for the test group and control group, and analysis will be performed using chi-square test.  
482

#### 483 **11. Regulations on compensation for research subjects**

484 Before conducting clinical trials, the principal investigator must check the following.

- 485 1) The principal investigator will assume responsibility and provide compensation if research subjects  
486 experience physical damage in the process of resolving abnormal reactions and treatment or  
487 hospitalization is required.
- 488 2) The principal investigator will exert all efforts to ensure no disadvantage to subjects in the clinical  
489 trials in accordance with these regulations.

490

#### 491 **12. References**

- 492 1. Korea Gastric Cancer Association. Nationwide Gastric Cancer Report in Korea. J Korean Gastric  
493 Cancer Assoc 2002;2:105-111.
- 494 2. Chung KW, Cho SJ, Yang HK, Kim WH, Lee KU, Choe KJ, Kim YI, Kim JP. Clinicopathological  
495 analysis for recurrence after surgery for early gastric cancer. Cancer Research and Treatment  
496 2000;32:312-320.
- 497 3. Sano T, Katai H, Sasako M, Maruyama K. The management of early gastric cancer. Surg Oncol  
498 2000;9:17-22.
- 499 4. Dallemagne B, Weerts JM, Jhaes C, Markiewicz S, Lombard R. Laparoscopic Nissen fundoplication:  
500 preliminary report. Surg Laparosc Endosc 1991;1:138-43.
- 501 5. Fowler DL, White SA. Laparoscopic resection of a submucosal gastric lipoma: a case report. J  
502 Laparoendosc Surg 1991;1:303-6.
- 503 6. Ohgami M, Otani Y, Kumai K, Kubota T, Kim YI, Kitajima M. Curative laparoscopic surgery for early  
504 gastric cancer: five years experience. World J Surg 1999;23:187-92.
- 505 7. Kitano S, Iso Y, Moriyama M, Sugimachi K. Laparoscopy-assisted Billroth I gastrectomy. Surg  
506 Laparosc Endosc 1994;4:146-8.
- 507 8. Yang HK, Kim MC, Kim YW, Kim YI, Kim EK, Kim HH, Park KK, Bae JM, Baik HG, Sul JY, Shin  
508 SH, Lee YB, Lee JM, Lee JH, Lee HJ, Jeon HM, Cho GS, Choi SH, Choi YB, Han SU, Han HS, Hur KY,

509 Hyung WJ, Hong BH, the Information Committee of the Korean Gastric Cancer Association. Nationwide  
510 Survey of Laparoscopic Gastric Surgery in Korea. J Korean Gastric Cancer Assoc 2004;4:196-203.

511 9. Lee TM, Kwon Y, Kim MC, Jung GJ, Kim HH. Operative Outcome of Laparoscopy-assisted  
512 Gastrectomy with Lymph Node Dissection in 117 Consecutive Patients with Gastric Cancer: A Single-  
513 center Experience. J Korean Surg Soc 2004;67:106-11.

514 10. Kim MC, Lee SG, Jung IK, Jung GJ, Kim HH. Comparison of Laparoscopy-Assisted by Conventional  
515 Open Distal Gastrectomy and Extraperigastric Lymph Node Dissection in Early Gastric Cancer. J Korean  
516 Surg Soc 2005;68:24-9.

517 11. Sung JY, Park TJ, Jeong CY, Joo YT, Lee YJ, Hong SC, Ha WS. Laparoscopic Gastric Surgery in  
518 Early Gastric Cancer: the Analysis of Early 25 Cases. J Korean Gastric Cancer Assoc 2004;4:230-4.

519 12. Kitano S, Shiraishi N, Fujii K, Yasuda K, Inomata M, Adachi Y. A randomized controlled trial  
520 comparing open vs laparoscopy-assisted distal gastrectomy for the treatment of early gastric cancer: an  
521 interim report. Surgery 2002;131:S306-11.

522
