# Supplementary material
Source: PubMed Central journal article supplement (PMC6459124)
Supplement: jamaoncol-5-506-s002.pdf [file jamaoncol-5-506-s002.pdf]

## Supplementary Online Content

Kim H-H, Han K-U, Kim M-C, et al; Korean Laparoendoscopic Gastrointestinal Surgery Study Group. Effect of laparoscopic distal gastrectomy vs open distal gastrectomy on long-term survival among patients with stage 1 gastric cancer: the KLASS-1 randomized clinical trial. *JAMA Oncol*. Published online February 7, 2019. doi:10.1001/jamaoncol.2018.6727

**eTable.** Comparison of causes of death and recurrence patterns for patients included in the per-protocol population

**eFigure 1.** Kaplan-Meier survival curves for patients included in the final analysis in the per-protocol population

**eFigure 2.** Post hoc subgroup analysis for overall survival

This supplementary material has been provided by the authors to give readers additional information about their work.

**eTable.** Comparison of causes of death and recurrence patterns in the per-protocol population

|                          | LDG<br>(n=644) | ODG<br>(n=611) | <i>P</i> |
|--------------------------|----------------|----------------|----------|
| Total deaths - no.       |                |                | 0.526    |
| Gastric cancer-related   | 24             | 24             |          |
| Other malignancy-related | 8              | 8              |          |
| Others                   | 32             | 30             |          |
| Unknown                  | 7              | 14             |          |
| Total recurrence - no.   |                |                | 0.518    |
| Locoregional             | 9              | 5              |          |
| Hematogenous             | 11             | 11             |          |
| Peritoneal               | 8              | 5              |          |
| Distant lymph node       | 1              | 3              |          |
| Mixed                    | 6              | 5              |          |

**eFigure 1.** Kaplan–Meier survival curves for patients included in the final analysis in the per-protocol population.

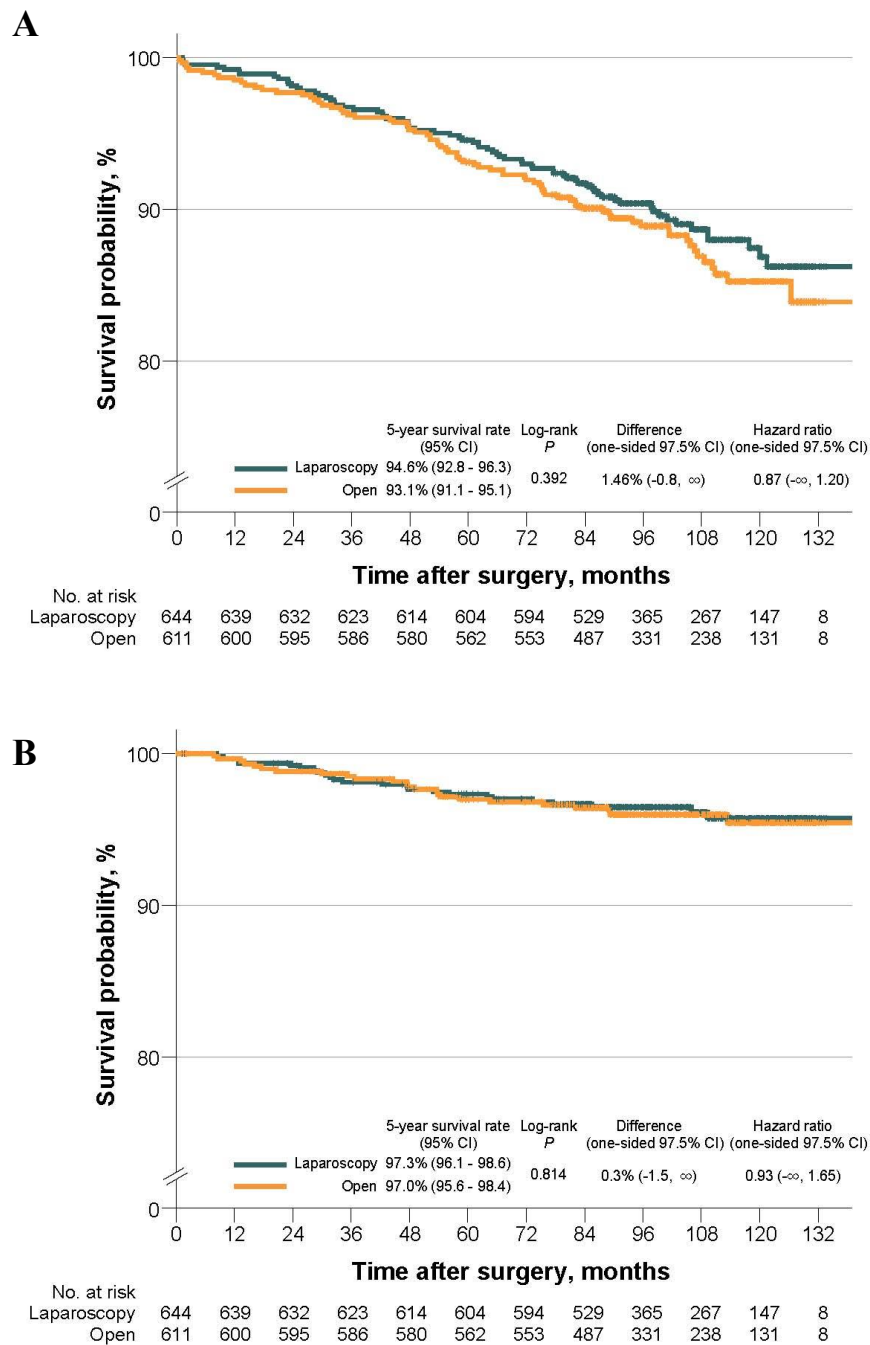

A, Overall survival was similar between the laparoscopic group and the open group (log-rank  $P = 0.392$ ). B, Cancer-specific survival was also similar (log-rank  $P = 0.814$ ). The median follow-up of patients was 99.8 months in all groups.

eFigure 2. Post-hoc subgroup analysis for overall survival.

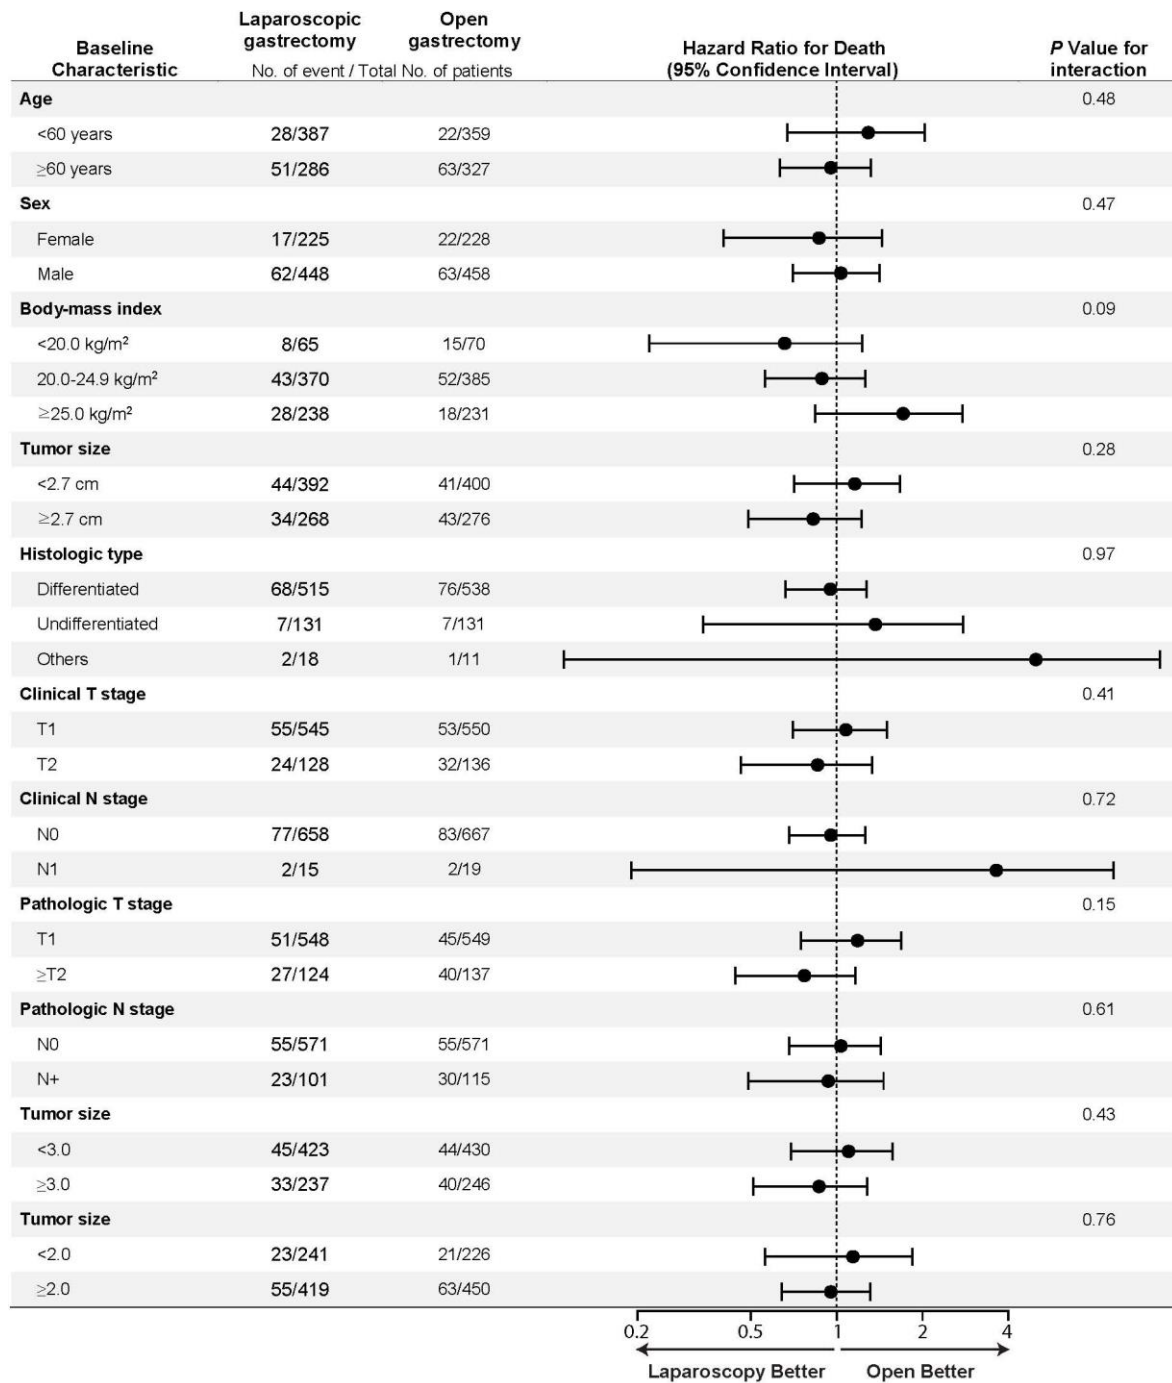

HR denotes hazard ratio and CI confidence interval. The figure shows *P* values for interactions and HRs for death in the laparoscopic group, with 95% CIs.

\* Data missing for 23 patients.

† Data missing for 15 patients who had unknown histologic type.

‡ Data missing for 1 patient who underwent laparoscopic biopsy for peritoneal seeding nodule biopsy.

© 2019 American Medical Association. All rights reserved.
