# Supplementary material
Source: PubMed Central journal article supplement (PMC6459124)
Supplement: jamaoncol-5-506-s003.pdf [file jamaoncol-5-506-s003.pdf]

## **Data Sharing Statement**

Kim. Effect of Laparoscopic Distal Gastrectomy vs Open Distal Gastrectomy on Long-term Survival Among Patients with Stage 1 Gastric Cancer. *JAMA Oncol*. Published February 07, 2019.  
10.1001/jamaoncol.2018.6727

### **Data**

**Data available:** No
